# Supplementary material for: Additive printing of recyclable anti-counterfeiting patterns with sol–gel cellulose nanocrystal inks
Source: Royal Society of Chemistry journal article supplement (doi:10.1039/d1nr01777b), 2021-01-01
Supplement: d1nr01777b1.pdf [file d1nr01777b1.pdf]

## Supporting Information

# Additive Printing of Recyclable Anti-Counterfeiting Patterns with Sol–Gel Cellulose Nanocrystal Inks

Dong Li,<sup>†</sup> Jun Yuan,<sup>‡</sup> Qaoyun Cheng,<sup>§</sup> Peng Wei,<sup>//</sup> Gary J. Cheng,<sup>\*,‡</sup> Chunyu Chang<sup>\*,†</sup>

<sup>†</sup> *College of Chemistry and Molecular Sciences, Engineering Research Center of Natural Polymer-based Medical Materials in Hubei Province, and Laboratory of Biomedical Polymers of Ministry of Education, Wuhan University, Wuhan, 430072, China*

<sup>‡</sup> *School of Industrial Engineering, Purdue University, West Lafayette, IN 47906, USA*

<sup>§</sup> *Institute of Bioengineering, Guangdong Academy of Science, Research Center for Sugarcane Industry Engineering Technology of Light Industry, Guangzhou 510316, China*

<sup>//</sup> *Plastic repair reconstructive surgery Department, Ningbo First Hospital, Ningbo Hospital of Zhejiang University, Ningbo 315010, China*

\*Corresponding authors

Email: changcy@whu.edu.cn (C. Chang); gjcheng@purdue.edu (G. J. Cheng)

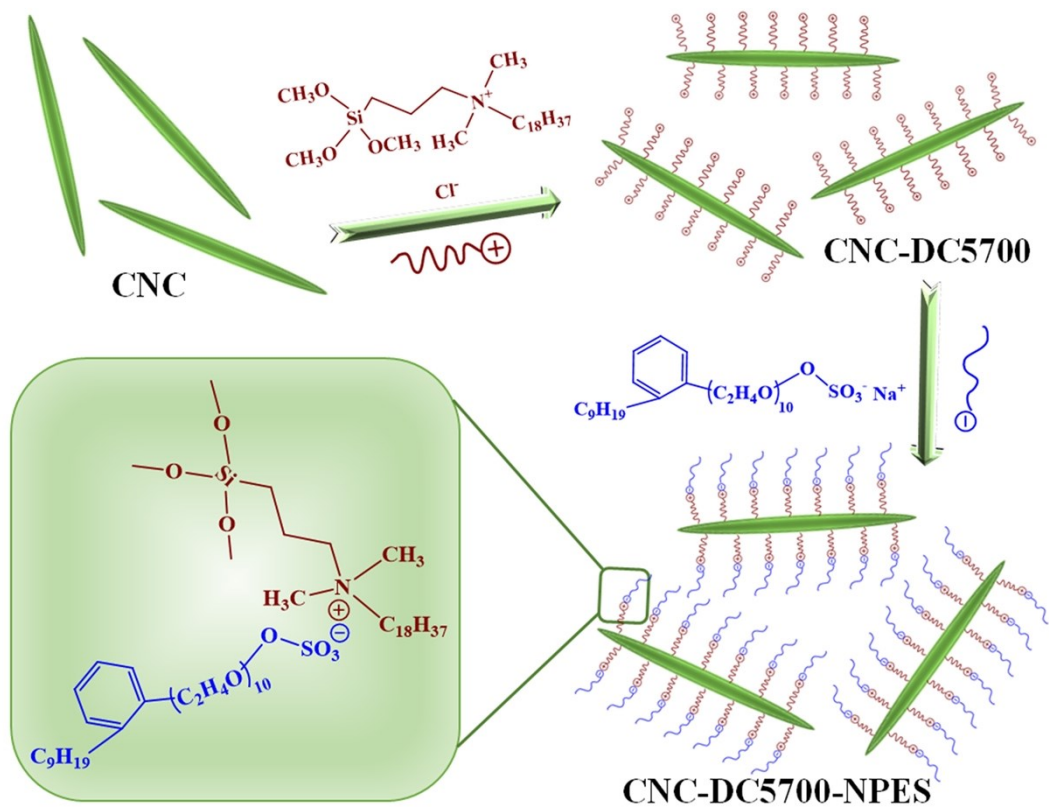

**Figure S1.** Schematic illustration for the preparation of surface functionalized CNCs.

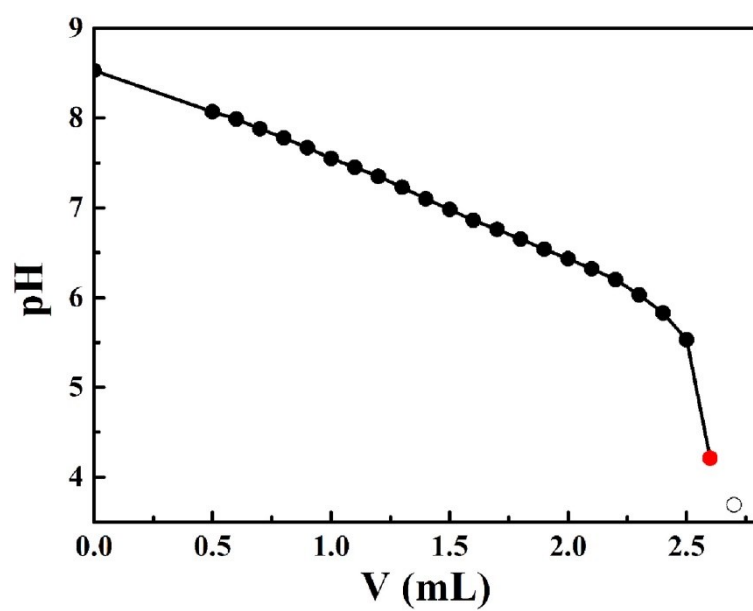

Figure S2. pH titration curves of CNC-DC5700-NPES.

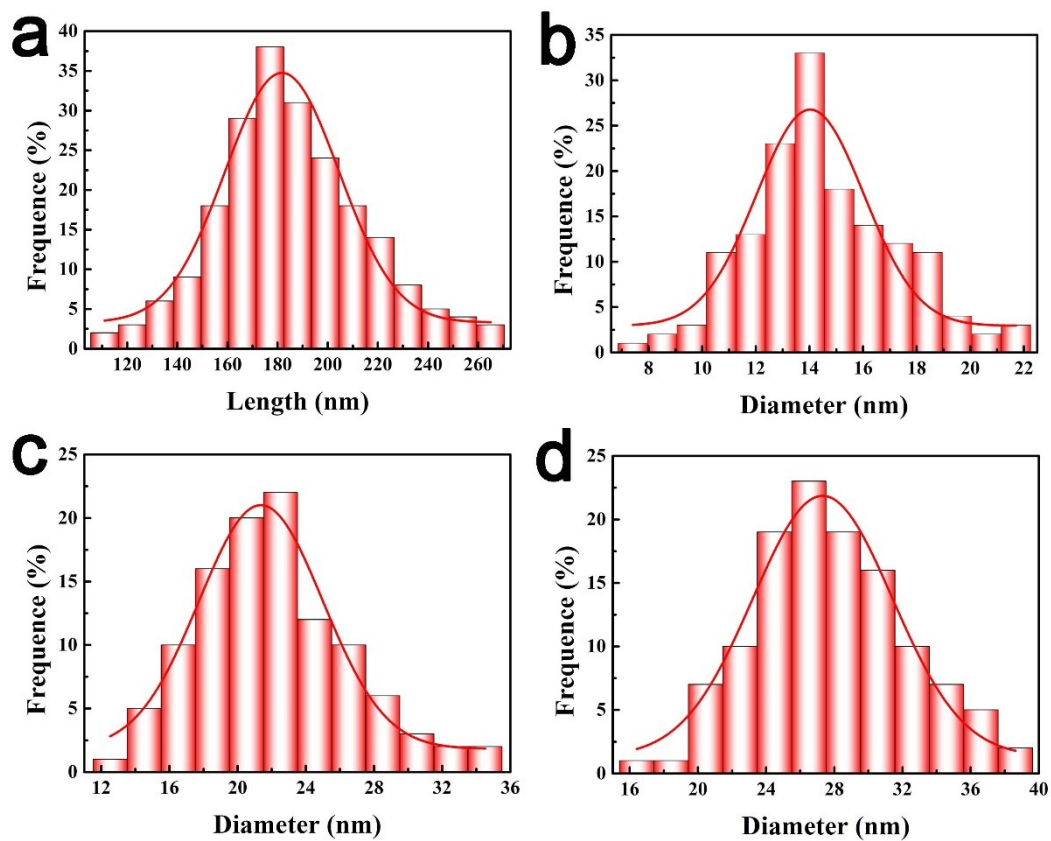

**Figure S3.** The length distribution of CNC (a) and the diameter distribution of CNC (b), CNC-DC5700 (c) and CNC-DC5700-NPES (d).

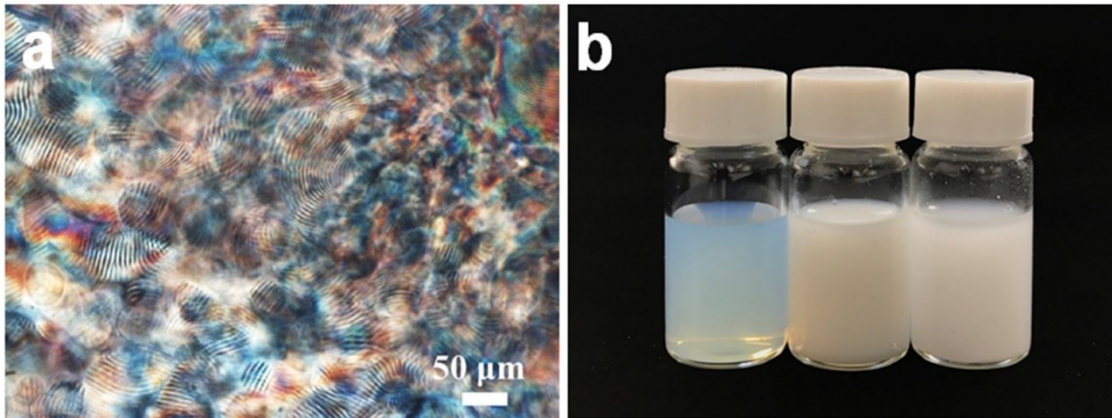

**Figure S4.** POM images of CNC suspension (a) and photographs of suspensions (1 wt.%), from left to right: CNC, CNC-DC5700, and CNC-DC5700-NPES (b).

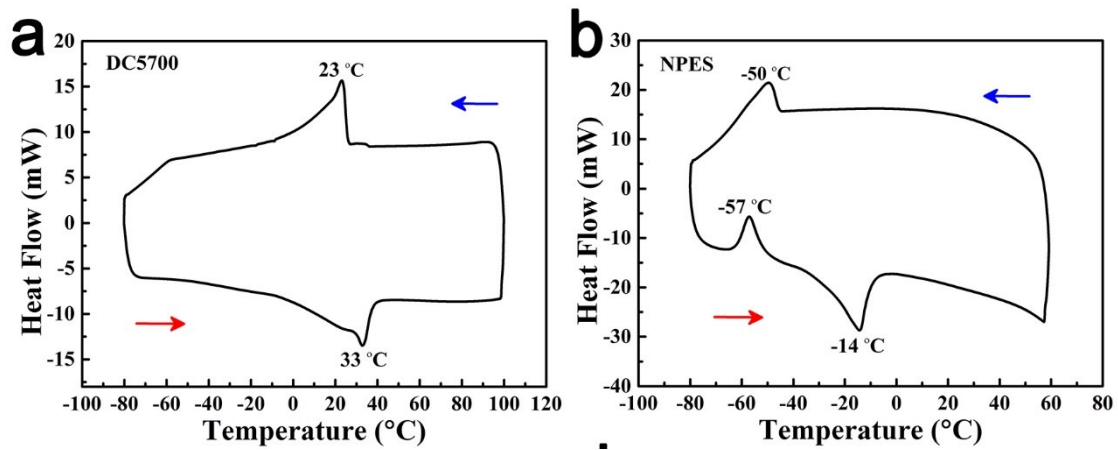

Figure S5. DSC traces of DC5700 (a) and NPES (b).

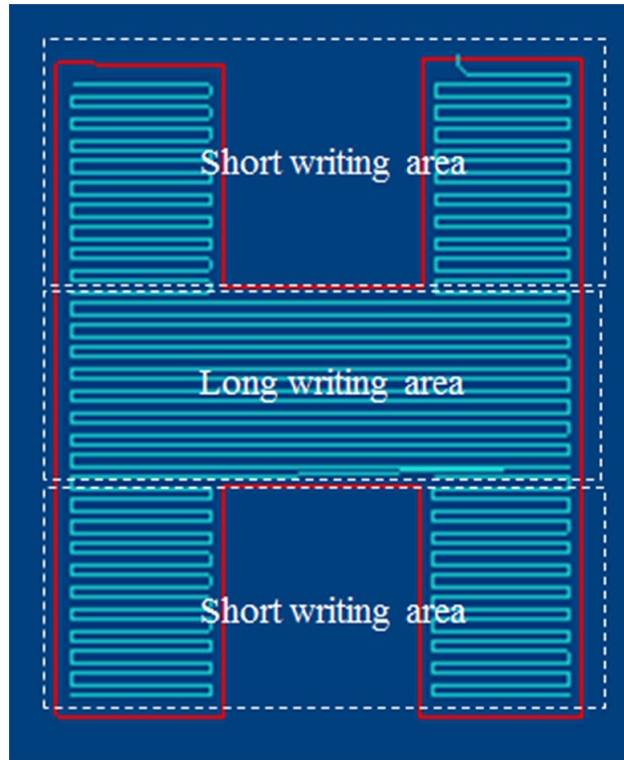

**Figure S6.** The illustration of long writing area and short writing area in the pattern.

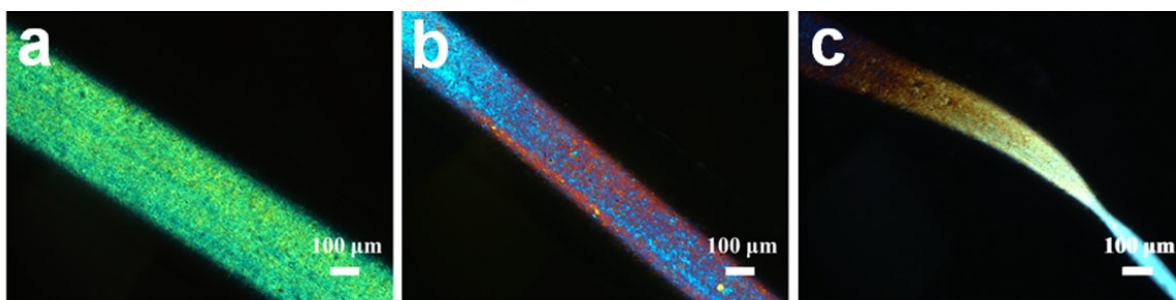

**Figure S7.** POM images of printed filaments under stretching (a) 0%, (b) 50%, and (c) 100%.



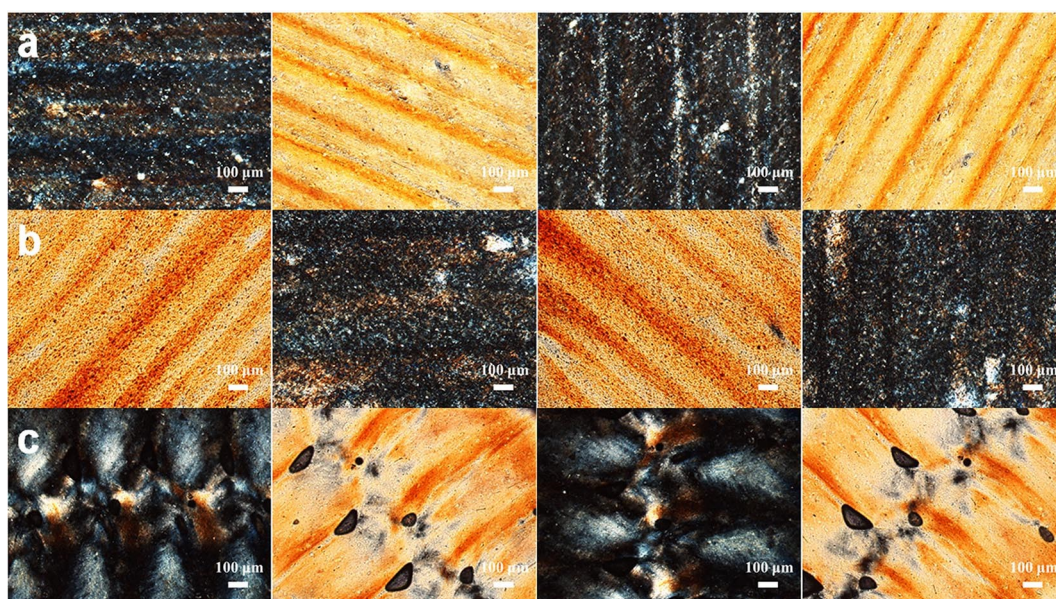

**Figure S8.** POM images of enlarged “H” printed with different writing angles: 0° (a), 45° (b) and 90° (c) observed under 0°, 45°, 90° and 135° in turn, from left to right.

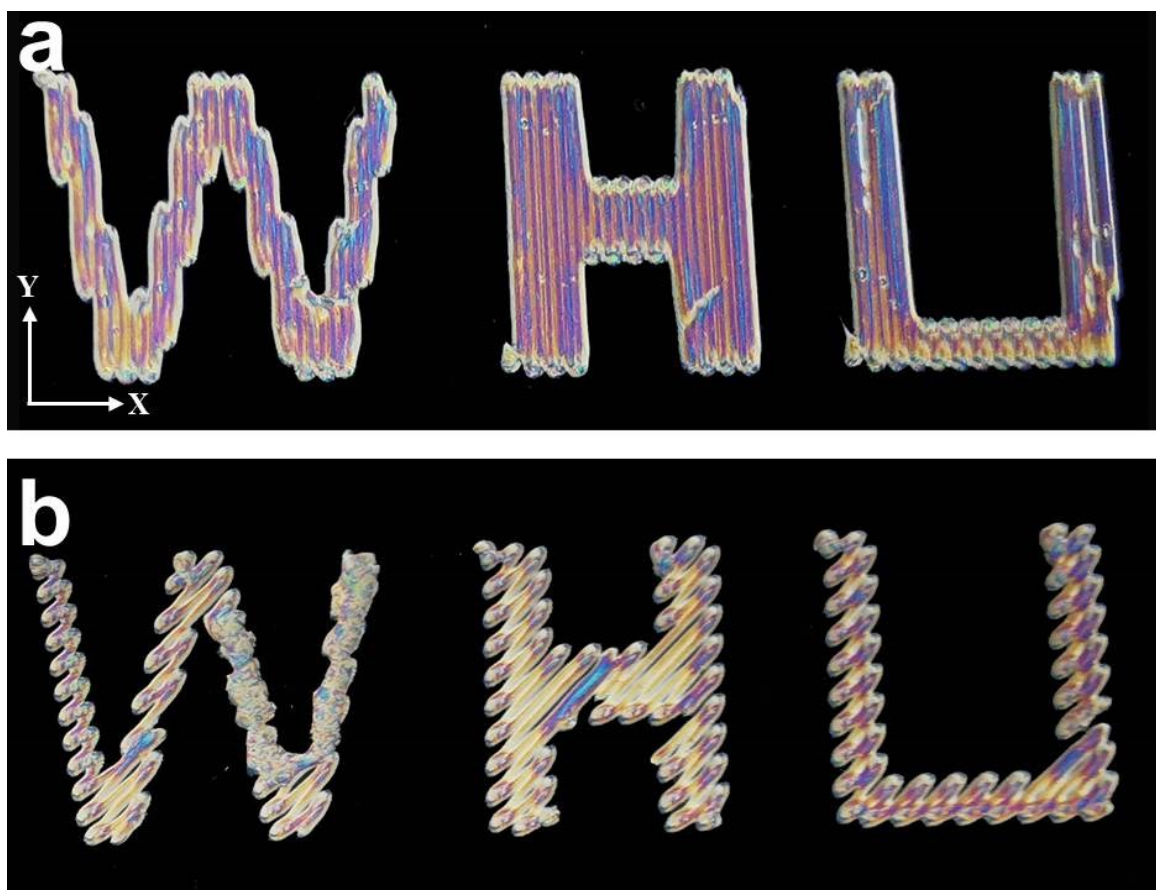

**Figure S9.** Photographs of “WHU” patterns printed with the recycled inks using a nozzle with a diameter of 0.6 mm under polarized light. Printing conditions: (a) grid fill width was 0.6 mm and writing angle was 90°. (b) grid fill width was 0.3 mm and writing angle was 45°. The length of all patterns in Y direction was 2 cm.
